# Supplementary material
Source: Springer Nature journal article supplement (https://www.springerprofessional.de/resource/supplementary/40008_2013_18_MOESM1_ESM.mos/11899454)
Supplement: MOESM1 [file 11899454]

! ******** triangulate_iot.mos ********
!
! Triangulation of an input-output table
!
! Usage 1:  mosel -c "exec triangulate_iot.mos"
!
!   The default names, iot.mdat and rank.csv, are used for input- and
!   output-data files.
!   Input-data file in the Xpress format contains two variables, "NSec"
!   and "A": "NSec" refers to the number of sectors, and "A" refers to
!   an IOT to be triangulated.
!   Output-data file in the CSV format contains two columns: the first
!   column refers to the sequential numbers for sectors and the second
!   column refers to their rankings in the optimally triangulated IOT.
! 
! Usage 2:  mosel -c "exec triangulate_iot.mos IN_FILE='your_data.mdat', OUT_FILE='your_result.csv'"
!
!   Names of data files can be modified.
!
!
model "Triangulation of an input-output table"
  uses  "mmxprs";
  options explterm;
  
  parameters
    IN_FILE = "iot.mdat";
    OUT_FILE = "rank.csv";
  end-parameters
  
  declarations
    NSec: integer;  ! Number of sectors
  end-declarations
  
  initializations from IN_FILE
    NSec;
  end-initializations
  
  declarations
    SSec = 1 .. NSec;  ! Set (range) of sectors
    A: array(SSec, SSec) of real;   ! Matrix to be triangularized
    X: array(SSec, SSec) of mpvar;  ! Decision variables
    Xo: array(SSec, SSec) of real;  ! Optimal solutions
    Rank: array(SSec) of real;      ! Optimal rankings
  end-declarations
  
  initializations from IN_FILE
    A;
  end-initializations
  
  ! Constraints                                  
  forall(i in SSec, j in SSec)  X(i, j) is_binary;
  forall(i in SSec, j in SSec | i < j, k in SSec | j < k)  X(i, j) + X(j, k) - X(i, k) >= 0;
  forall(i in SSec, j in SSec | i < j, k in SSec | j < k)  X(i, j) + X(j, k) - X(i, k) <= 1;
  
  ! Objective function
  LowSum := sum(i in SSec, j in SSec | i < j) ((A(i, j) - A(j, i)) * X(i, j) + A(j, i));
  
  ! Solve the problem
  maximize(LowSum);
  
  ! Write solutions
  forall(i in SSec) do
    Xo(i, i) := 1;
    forall(j in SSec | i < j)  Xo(i, j) := getsol(X(i, j));
    forall(j in SSec | i > j)  Xo(i, j) := 1 - getsol(X(j, i));
    Rank(i) := sum(j in SSec) Xo(i, j);
  end-do
  
  fopen(OUT_FILE, F_OUTPUT);
  forall(i in SSec)  writeln(i, ',', Rank(i));
  fclose(F_OUTPUT);

end-model 
